# Supplementary material
Source: Springer Nature journal article supplement (http://www.springermedizin.de/resource/supplementary/12888_2009_661_MOESM1_ESM.pdf/9478084)

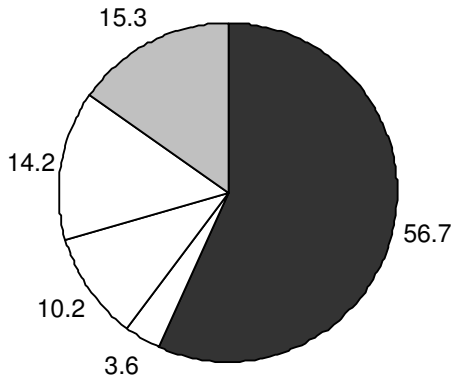

- Hospitalization
- Primary care
- Specialized care
- Antipsychotics
- Other psychoactive drugs

Supplement: MOESM1 [file 9478084]
